# Supplementary material for: Loss of ARID1A Expression in Gastric Cancer: Correlation with Mismatch Repair Deficiency and Clinicopathologic Features
Source: PubMed Central journal article supplement — J Gastric Cancer. 2015 Sep 30;15(3):201–8. doi: 10.5230/jgc.2015.15.3.201 (PMC4604335; doi:10.5230/jgc.2015.15.3.201), 2015-09-30
Supplement: jgc-15-201-s001.pdf [file jgc-15-201-s001.pdf]

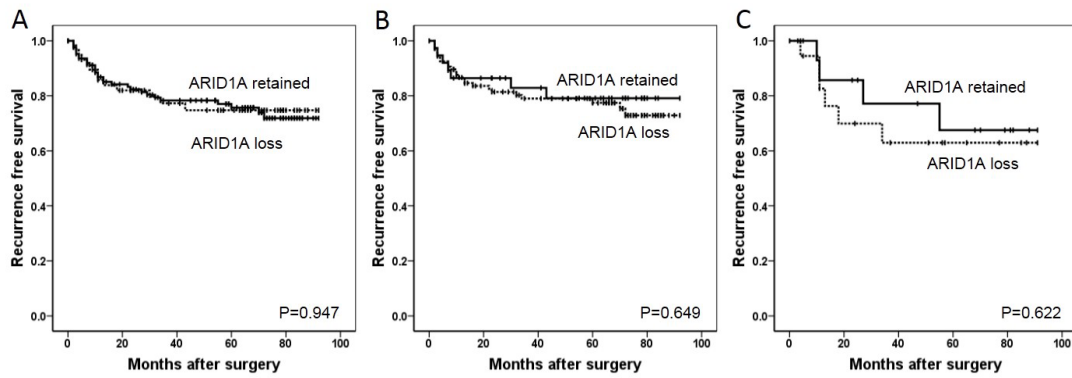

Supplementary Fig. 1. Kaplan-Meier survival analysis with log-rank test. (A) Recurrence free survival curve of the loss of expression (n=60) vs. retained expression groups (n=128) in all patients. (B) Recurrence free survival curve of the loss of expression (n=38) vs. retained expression groups (n=109) in mismatch repair (MMR)-deficient patients. (C) Recurrence free survival curve of the loss of expression (n=19) vs. retained expression groups (n=17) in MMR-proficient patients.
